# Supplementary material for: Toward an Ion-Based Large-Scale Integrated Circuit:Circuit Level Design, Simulation, and Integration of Iontronic Components
Source: Research Square preprint supplement (doi:10.21203/rs.3.rs-5470570/v1), 2025-04-01
Supplement: Supplementary file 1 [file d3ac9ae6dc1382aa8d3e3f46.docx]

# Supplementary Information

## EIS measurement

Figure S1(a) presents the EIS measurements of the iontronic diode at five different operating points: -1V, -0.5V, 0V, 0.5V, and 1V. The measurements span frequencies from 0.1 Hz to 1 MHz. In Figure S1(b), the circuit on the left represents the equivalent circuit used for fitting the data (the fitted results are shown as dashed lines in FigureS1(a)). After examining the behavior of each component with respect to the applied DC voltage, we concluded that a simpler equivalent circuit (middle circuit in Figure S1(b)) could also fit the data. The values of C01 and R1, C01 can beneglected at lower frequencies, thus enabling the circuit on the right depicted in Figure S1b to describe the system's behavior.


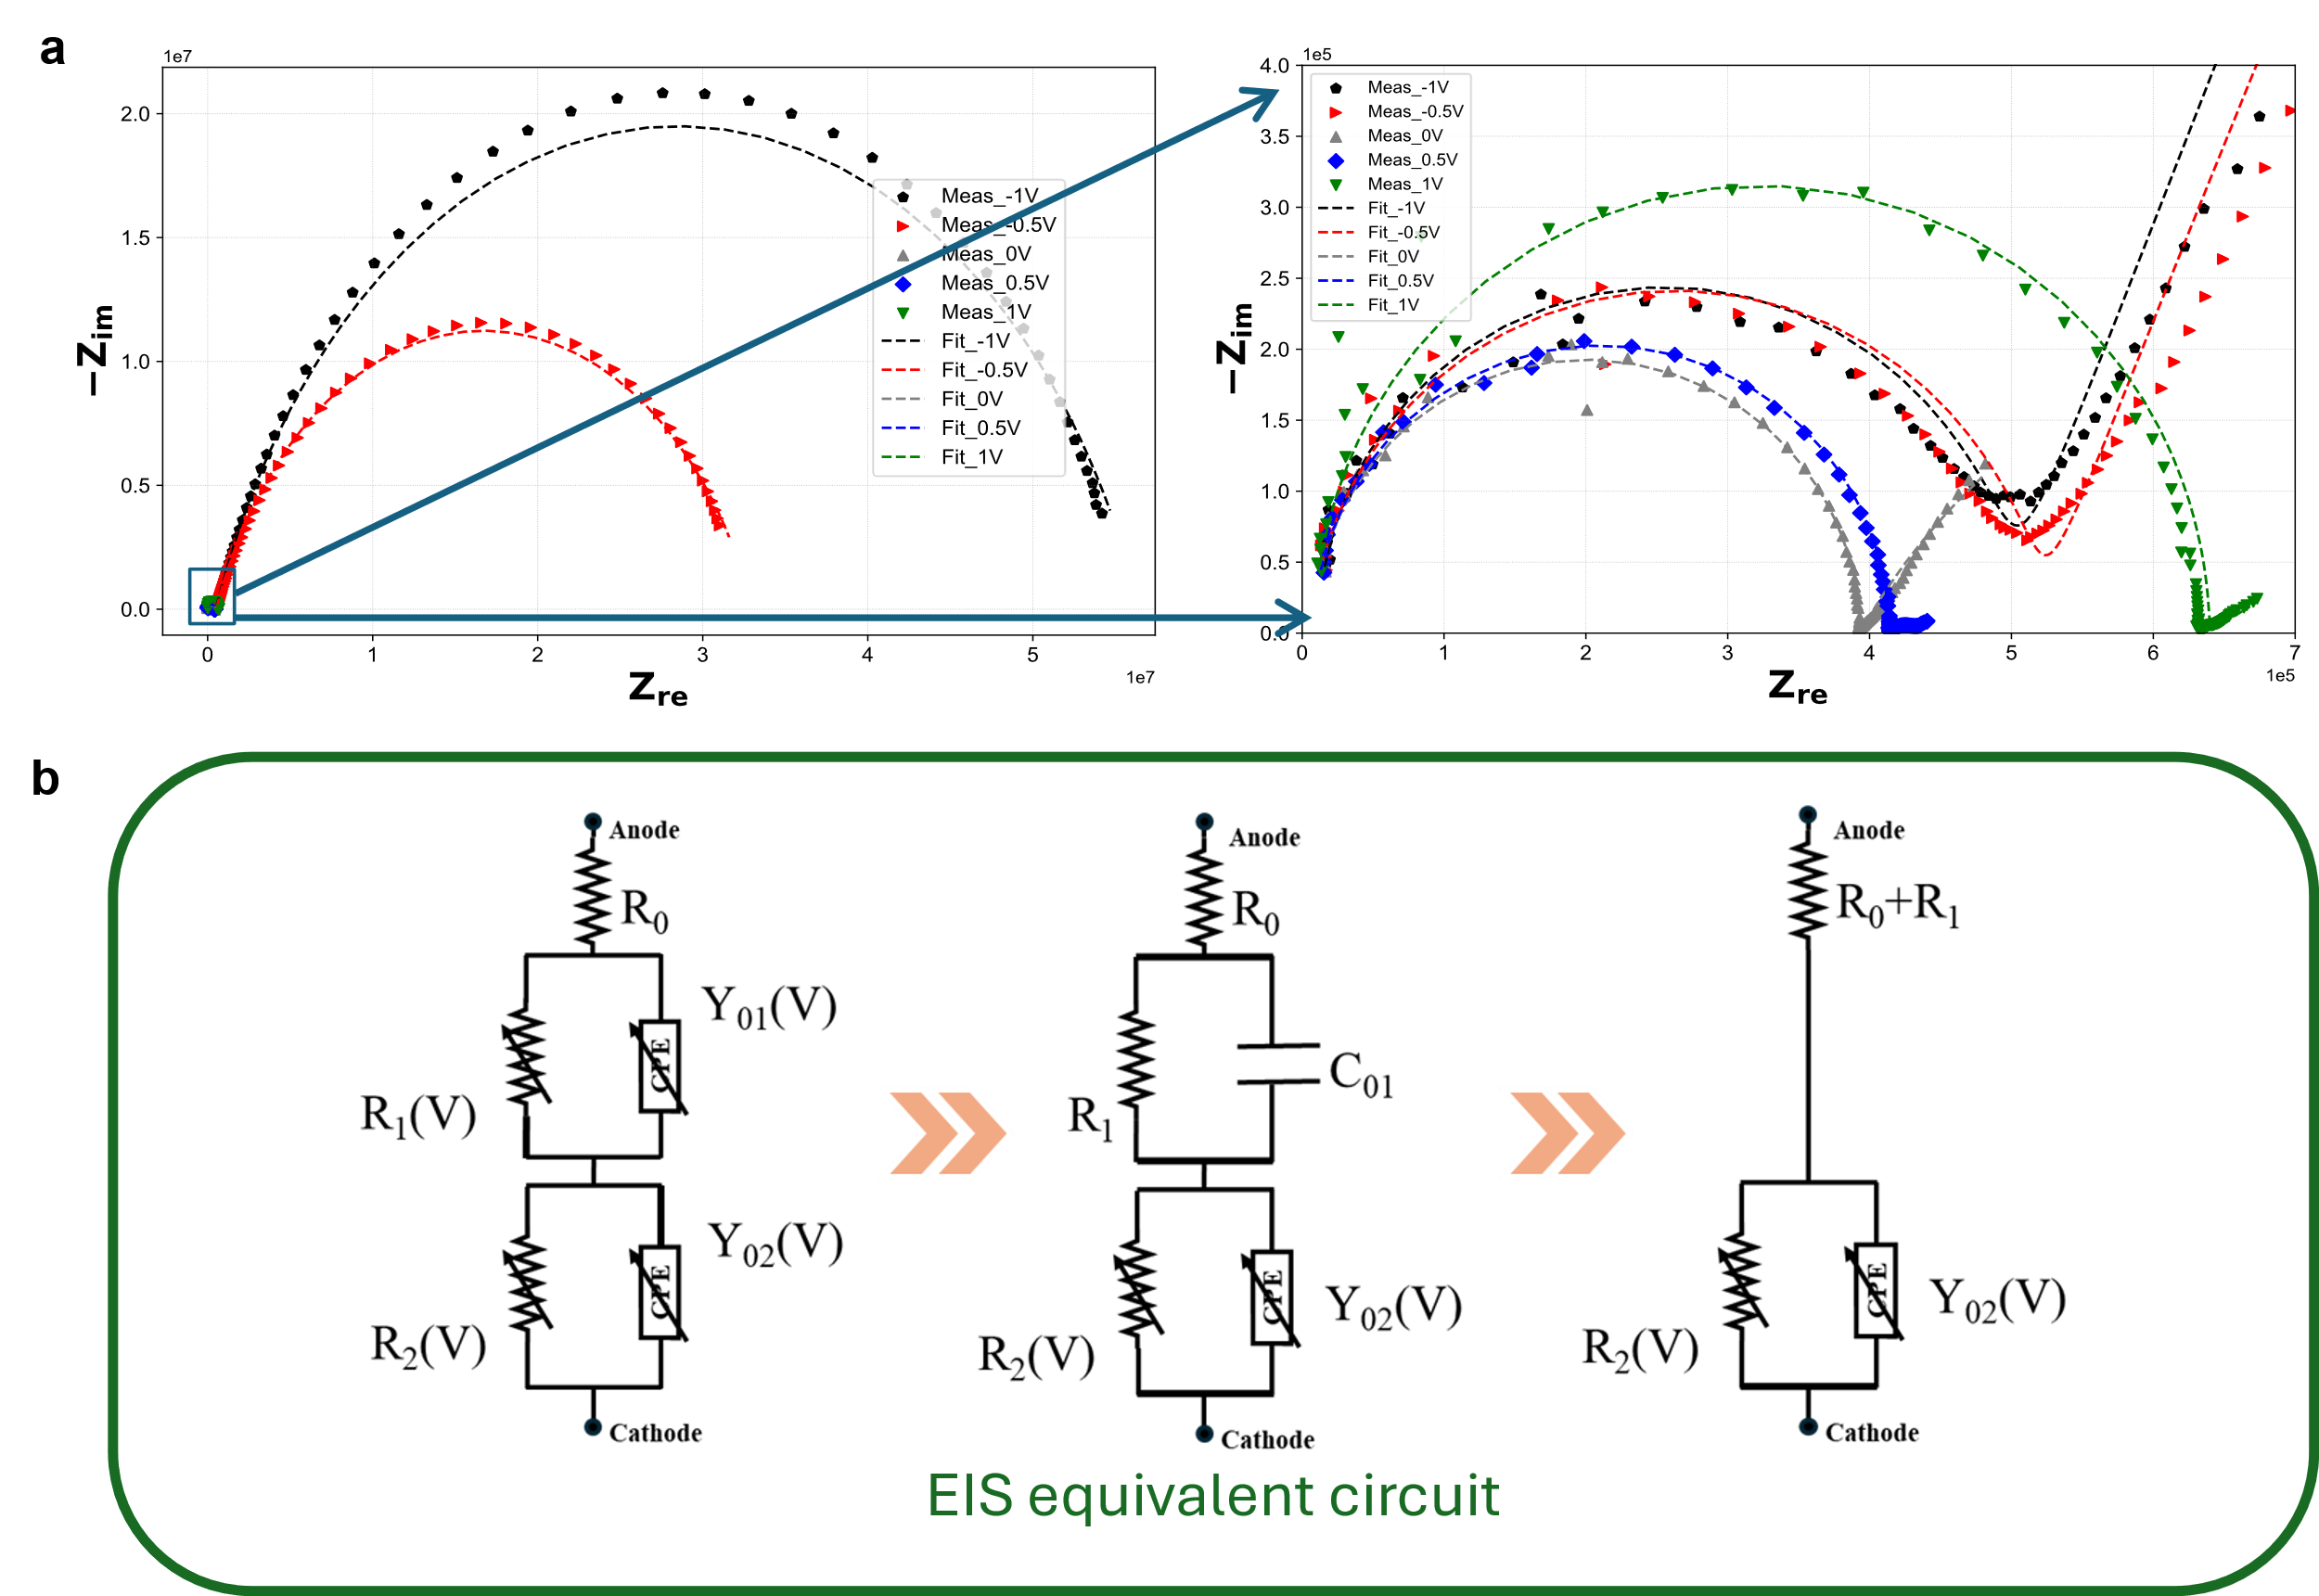


**Figure S 1:** (a) EIS measurements of the iontronic diode operating at voltage points of: -1V, -0.5V, 0V, 0.5V, and 1V (0.1 Hz to 1 MHz). The dashed lines represent the fitting of the left circuit model from (b) to the measured data. (b) Equivalent circuit models for data fitting: left (full model), middle (simplified model), and right (neglecting C01 at low frequencies).

## Ion and Ioff measurements on a chip with 15 integrated diodes

##
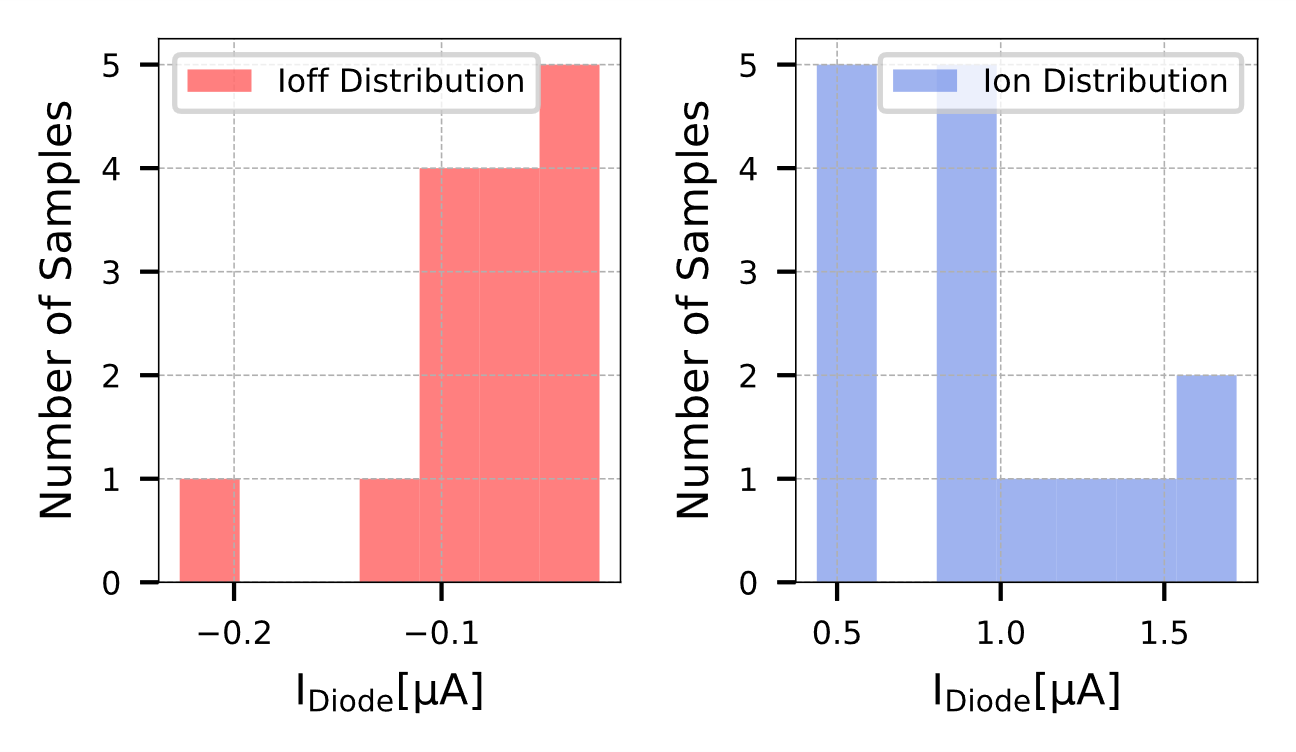


**Figure S 2** **Distribution of Ion and Ioff in a chip with 15 integrated diodes:** The variations observed in the electrical characteristics of an integrated chip with 15 diodes. The differences were caused by variations during chip fabrication. Ioff and Ion are the diode’s current when applying a equal to -1V and 1V, respectively.
